# Supplementary material for: Ice shelf basal melt rates from a high-resolution DEM record for Pine Island Glacier, Antarctica
Source: Copernicus journal article supplement (doi:10.5194/tc-2018-209), 2018-10-16
Supplement: Supplementary file 1 [file tc-2018-209-supplement.pdf]

## Supplementary Figures

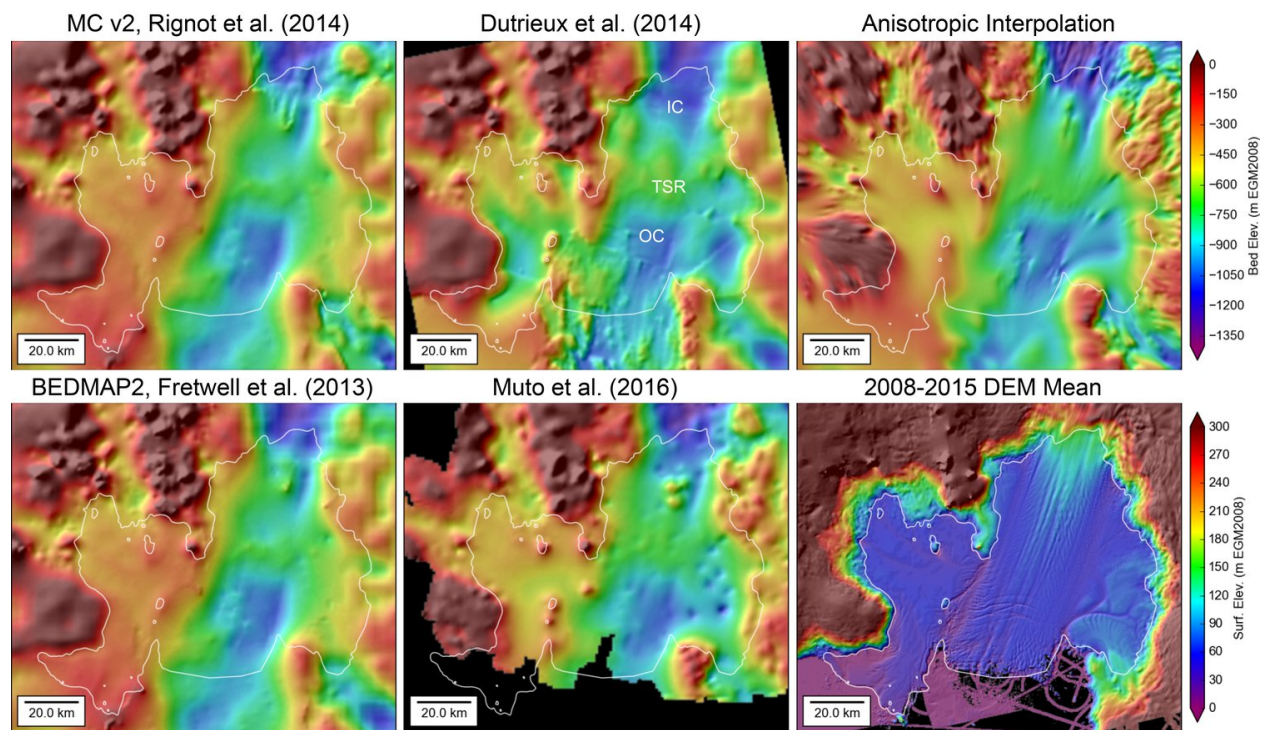

5 **Figure S1: Comparison of available bathymetry/bed datasets for PIG with mean surface elevation for comparison. Top row, center column plot includes labels for "Transverse Seabed Ridge" (TSR), which separates the "Inner Cavity" (IC) and "Outer Cavity" (OC). Note significant differences in inner cavity bathymetry for the different datasets.**

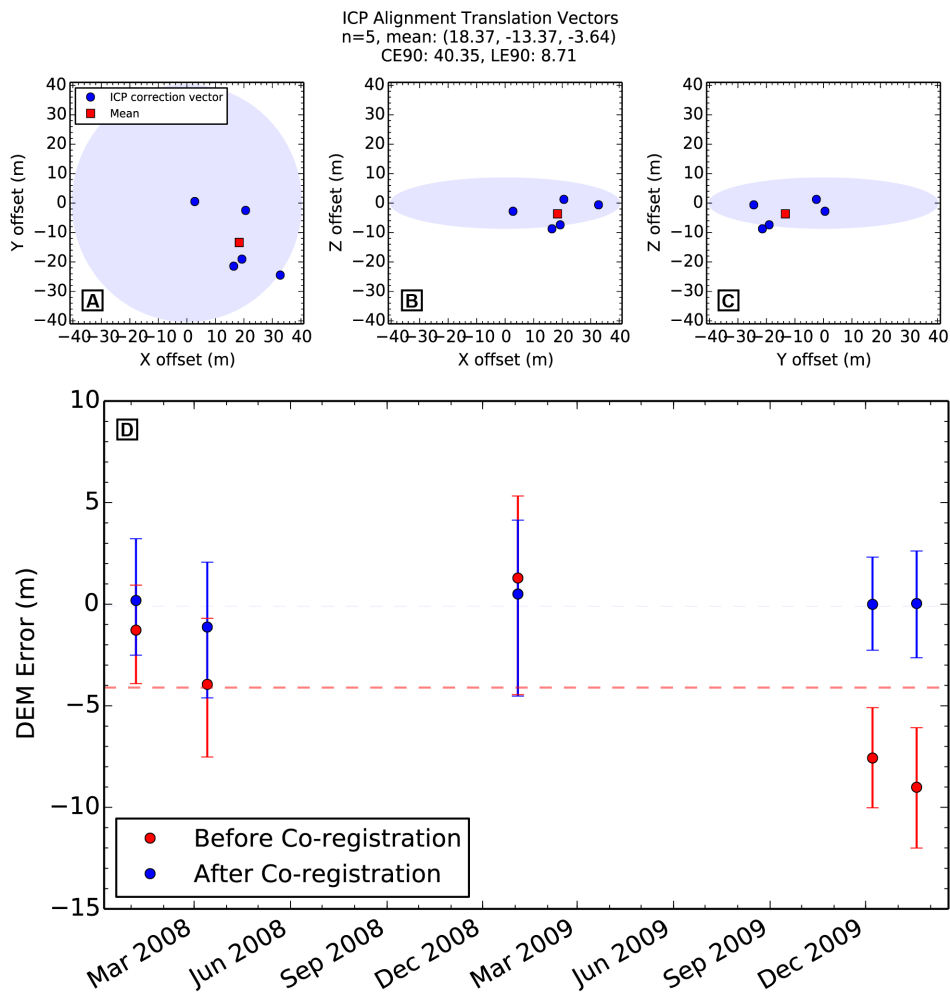

**Figure S2: PIG SPIRIT DEM co-registration results. Refer to Error! Reference source not found. caption for details.**

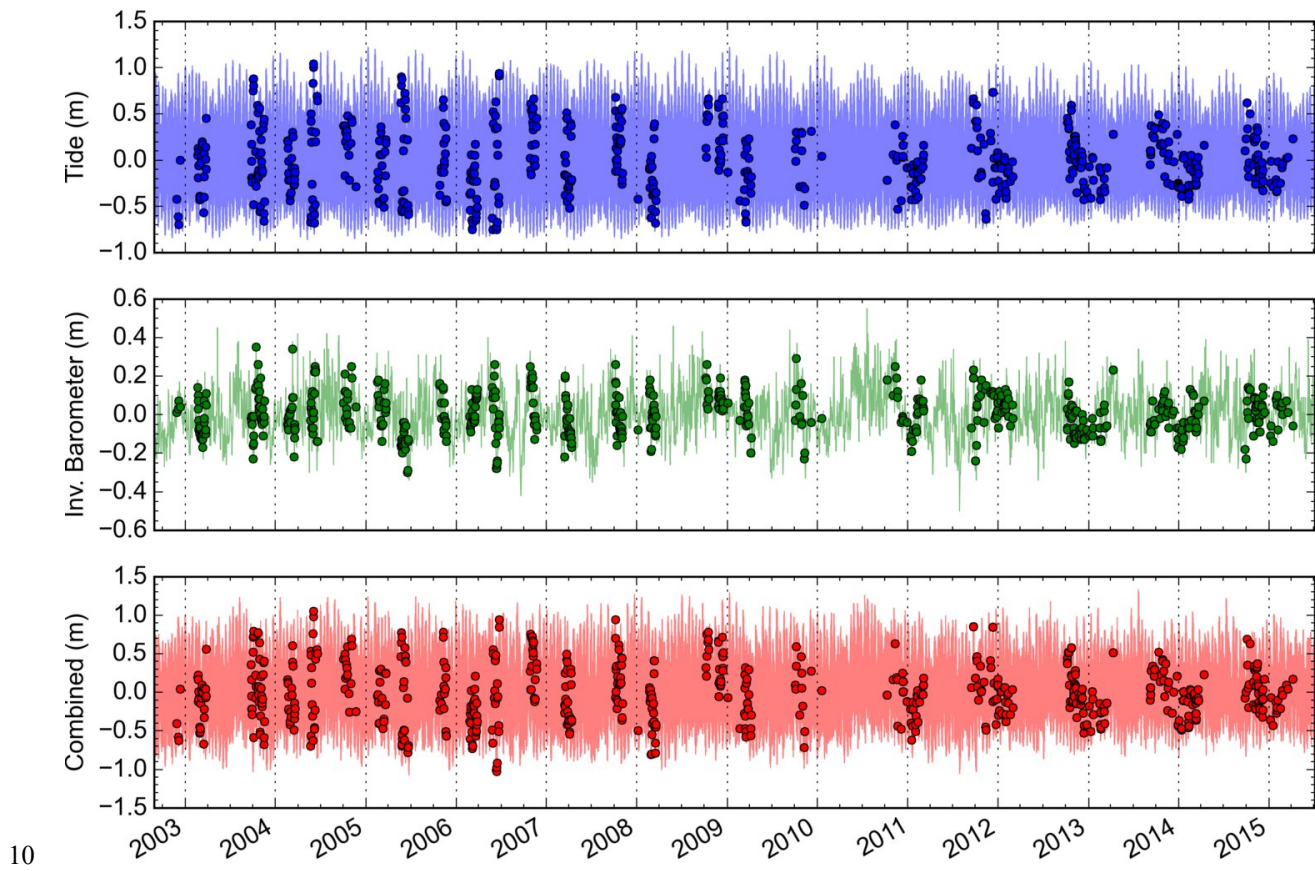

10

Figure S3: Magnitude of tide and inverse barometer corrections applied to timestamped DEM/altimetry elevation observations (points).

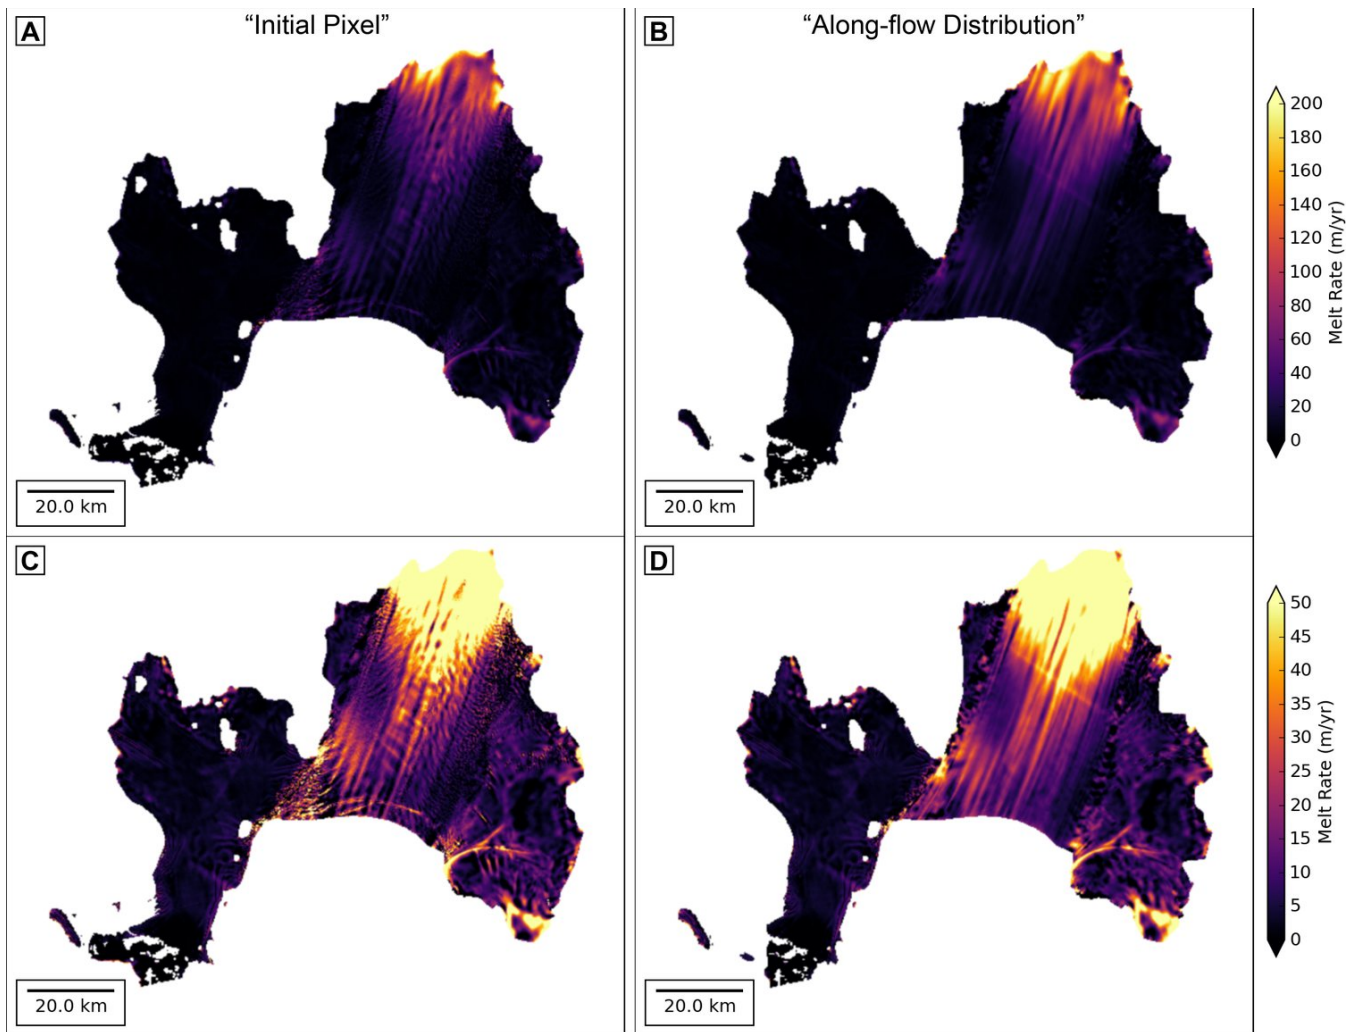

Figure S4: Mean 2008–2015 basal melt rates with different colorbar stretch.
